# Supplementary material for: Effect of radiochemotherapy on peripheral immune response in glioblastoma
Source: PubMed Central journal article supplement (PMC11098987; doi:10.1007/s00262-024-03722-5), 2024-05-16
Supplement: 262_2024_3722_MOESM2_ESM.pdf [file 262_2024_3722_MOESM2_ESM.pdf]

**Supplementary File Table 1. List of cytokines analyzed by Luminex Assay**

| <b>Cytokine</b> | <b>Assay Working range (pg/ml)</b> |
|-----------------|------------------------------------|
| CD40 Ligand     | 1659 - 59,995                      |
| EGF             | 32.6 - 1102                        |
| Eotaxin         | 63.9 - 2299                        |
| FGF basic       | 34.0 - 1084                        |
| Flt-3 Ligand    | 81.7 - 2783                        |
| G-CSF           | 29.8 - 1008                        |
| GM-CSF          | 60.9 - 2069                        |
| Granzyme B      | 14.3 - 469                         |
| Gro $\alpha$    | 173 - 2264                         |
| Gro $\beta$     | 38.3 - 1247                        |
| IFN $\alpha$    | 14.7 - 500                         |
| IFN $\beta$     | 13.0 - 446                         |
| IFN $\gamma$    | 18.1 - 611                         |
| IL-1 $\alpha$   | 36.0 - 1199                        |
| IL-1 $\beta$    | 12.2 - 432                         |
| IL-1ra          | 41.9 - 1386                        |
| IL-2            | 12.9 - 433                         |
| IL-3            | 61.0 - 2093                        |
| IL-4            | 4.10 - 140                         |
| IL-5            | 22.0 - 780                         |
| IL-6            | 34.3 - 1161                        |
| IL-7            | 14.1 - 484                         |
| IL-8            | 5.31 - 184                         |
| IL-10           | 102 - 2997                         |
| IL-12 p70       | 72.7 - 2419                        |
| IL-13           | 111 - 3847                         |
| IL-15           | 7.86 - 274                         |
| IL-17A          | 29.0 - 979                         |
| IL-17E          | 58.3 - 1938                        |
| IL-33           | 60.4 - 1926                        |
| IP-10           | 9.52 - 334                         |
| MCP-1           | 45.1 - 626                         |
| MIP-1 $\alpha$  | 42.9 - 571                         |
| MIP-1 $\beta$   | 319 - 11,240                       |
| MIP-3 $\alpha$  | 9.08 - 307                         |
| MIP-3 $\beta$   | 14.5 - 483                         |
| PDGF-AA         | 15.8 - 537                         |
| PDGF-AB/BB      | 24.6 - 867                         |
| PD-L1           | 271 - 9672                         |
| RANTES          | 1198 - 36,884                      |
| TGF- $\alpha$   | 31.8 - 1098                        |
| TNF $\alpha$    | 34.8 - 1325                        |
| TRAIL           | 87.3 - 2972                        |
| VEGF            | 19.9 - 678                         |
